# Supplementary material for: Entropy and Its Application to Number Theory
Source: Preprints.org preprint supplement (doi:10.20944/preprints202203.0371.v1), 2022-03-29
Supplement: Supplementary file 1 [file supplementary]

Mar. 27, 2022

Dear Preprints.org Editorial Office,

I would like to submit the manuscript entitled “Entropy and its Application to Number Theory” by “Seiji Fujino” to be considered for publication as “an original article” in the Preprints.org.

In this paper, we propose the expansion of the Planck distribution functions which is derived from the Boltzmann principle. Furthermore, we examine to expand Planck's law using new distribution functions.

Moreover, using the ideas applied to the expansion of the Planck distribution function, we show that the derivation of Von Koch's inequality without using the Riemann Hypothesis and the negation of the ABC conjecture. These results of number theory have already been submitted in advance by us as your Preprints.org. This paper also describes the original ideas for deriving these results.

Besides, we will describe some considerations and issues for the future.

Namely, Entropy (the second law) is associated with quantum mechanics and number theory.

Not only that it is also associated with dynamic systems, and electromagnetism and gravity theory by the law of inverse squares.

Some articles related to this article have already been pre-accepted as your Preprints.org.

Therefore, we would like to submit your organization.

We believe these findings will be of interest to the readers of your Preprints.

We declare that this manuscript is original, has not been published before and is not currently being considered for publication elsewhere.

We know of no conflicts of interest associated with this publication, and there has been no significant financial support for this work that could have influenced its outcome.

As the corresponding author, I would like the manuscript to be peer-reviewed and approved your publication.

We have been studying this article for years. Therefore, I decided to post it here because I thought that everyone should review and evaluate this article.

We hope that our article will be online on your Preprints and that you find our manuscript suitable for publication and look forward to hearing from you in due course.

We hope our challenge will help you in this difficult global world.

Yours Sincerely,

Seiji Fujino

RHC Institute.

Postal address: No.702, Shinjuku Komuro BLD., 4-1-22 Shinjuku, Shinjuku-ku, Tokyo, Japan.

Zip code: 160-0022

Email: [xfujino001@gmail.com](mailto:xfujino001@gmail.com), [xfujino001@rhc-institute.com](mailto:xfujino001@rhc-institute.com)
